# Supplementary material
Source: publisher site journal article supplement (https://www.spandidos-publications.com/8631/downloadSupplementary)

Figure S1. Knockdown efficiency of three siRNAs targeting PTPN22. (A) Western blotting of (B) PTPN22 expression following treatment with siRNA. \*\*\* $P < 0.0001$  vs. control. si, small interfering; PTPN, protein tyrosine phosphatase non-receptor type.

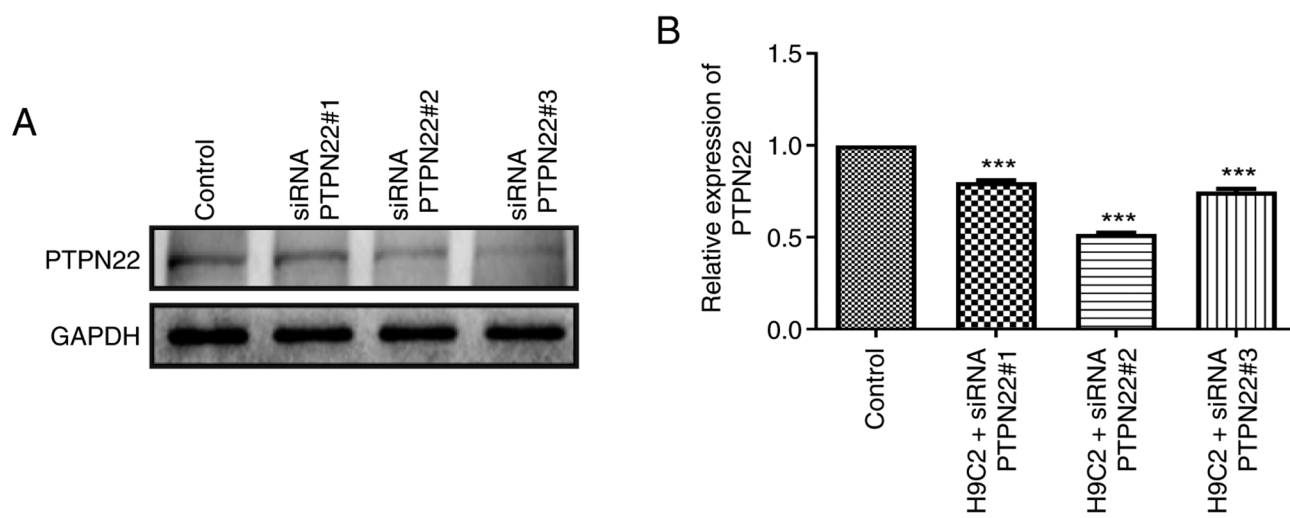

Supplement: Supplementary file 1 [file downloadSupplementary]
